# Supplementary material for: Randomized controlled multicenter trial on the effectiveness of the collagen hemostat Sangustop® compared with a carrier-bound fibrin sealant during liver resection (ESSCALIVER study, NCT00918619)
Source: Springer Nature journal article supplement (doi:10.1007/s00423-014-1203-9), 2014-05-31
Supplement: MOESM1 [file 8491342]

Supplement Table 4

**Table 4: Most frequent serious surgical complications**

|                                                 | COLL<br>n = 62 | CBFS<br>n = 65 |
|-------------------------------------------------|----------------|----------------|
| Bilioma                                         | 2 (3.2%)       | 3 (4.6%)       |
| Bile leak                                       | 2 (3.2%)       | 2 (3.1%)       |
| Intraabdominal fluid collection                 | 2 (3.2%)       | 2 (3.1%)       |
| Impaired wound healing (infections, dehiscence) | 1 (1.6%)       | 3 (4.6%)       |
| Post procedural haemorrhage                     | 1 (1.6%)       | 1 (1.5%)       |
